1  
2  
3  
4  
5  
6  
7  
8  
9  
10  
11  
12  
13  
14  
15  
16  
17  
18  
19  
20  
21  
22  
23  
24  
25  
26

Geographic shifts in *Aedes aegypti* habitat suitability in Ecuador using larval surveillance data and ecological niche modeling: Implications of climate change for public health vector control

Catherine A. Lippi<sup>1,2</sup>, Anna M. Stewart-Ibarra<sup>3</sup>, M.E. Franklin Bajaña Loor<sup>4</sup>, Jose E. Dueñas Zambrano<sup>4</sup>, Nelson A. Espinoza Lopez<sup>4</sup>, Jason K. Blackburn<sup>2,5</sup>, and Sadie J. Ryan<sup>1,2\*</sup>

<sup>1</sup>Quantitative Disease Ecology and Conservation (QDEC) Lab Group, Department of Geography, University of Florida, Gainesville, Florida, United States of America

<sup>2</sup>Emerging Pathogens Institute, University of Florida, Gainesville, Florida, United States of America

<sup>3</sup>Center for Global Health and Translational Science, Upstate Medical University, Syracuse, New York, United States of America

<sup>4</sup>Ministerio de Salud Pública, Guayaquil, Ecuador

<sup>5</sup>Spatial Epidemiology and Ecology Research (SEER) Laboratory, Department of Geography, University of Florida, Gainesville, Florida, United States of America

\*Corresponding author  
E-mail: [sjryan@ufl.edu](mailto:sjryan@ufl.edu) (SJR)

## 27 **Abstract**

28           Arboviral disease transmission by *Aedes* mosquitoes poses a major challenge to public  
29 health systems in Ecuador, where constraints on health services and resource allocation call for  
30 spatially informed management decisions. Employing a unique dataset of larval occurrence  
31 records provided by the Ecuadorian Ministry of Health, we used ecological niche models  
32 (ENMs) to estimate the current geographic distribution of *Aedes aegypti* in Ecuador, using  
33 mosquito presence as a proxy for risk of disease transmission. ENMs built with the Genetic  
34 Algorithm for Rule-Set Production (GARP) algorithm and a suite of environmental variables  
35 were assessed for agreement and accuracy. The top model of larval mosquito presence was  
36 projected to the year 2050 under various combinations of greenhouse gas emissions scenarios  
37 and models of climate change. Under current climatic conditions, larval mosquitoes were not  
38 predicted in areas of high elevation in Ecuador, such as the Andes mountain range, as well as the  
39 eastern portion of the Amazon basin. However, all models projected to scenarios of future  
40 climate change demonstrated potential shifts in mosquito distribution, wherein range  
41 contractions were seen throughout most of eastern Ecuador, and areas of transitional elevation  
42 became suitable for mosquito presence. Encroachment of *Ae. aegypti* into mountainous terrain  
43 was estimated to affect up to 4,215 km<sup>2</sup> under the most extreme scenario of climate change, an  
44 area which would put over 12,000 people currently living in transitional areas at risk. This  
45 distributional shift into communities at higher elevations indicates an area of concern for public  
46 health agencies, as targeted interventions may be needed to protect vulnerable populations with  
47 limited prior exposure to mosquito-borne diseases. Ultimately, the results of this study serve as a  
48 tool for informing public health policy and mosquito abatement strategies in Ecuador.

49

50 **Author summary**

51 The yellow fever mosquito (*Aedes aegypti*) is a medically important vector of arboviral diseases  
52 in Ecuador, such as dengue fever and chikungunya. Managing *Ae. aegypti* is a challenge to  
53 public health agencies in Latin America, where the use of limited resources must be planned in  
54 an efficient, targeted manner. The spatial distribution of *Ae. aegypti* can be used as a proxy for  
55 risk of disease exposure, guiding policy formation and decision-making. We used ecological  
56 niche models in this study to predict the range of *Ae. aegypti* in Ecuador, based on agency larval  
57 mosquito surveillance records and layers of environmental predictors (e.g. climate, altitude, and  
58 human population). The best models of current range were then projected to the year 2050 under  
59 a variety of greenhouse gas emissions scenarios and models of climate change. All modeled  
60 future scenarios predicted shifts in the range of *Ae. aegypti*, allowing us to assess human  
61 populations that may be at risk of becoming exposed to *Aedes* vectored diseases. As climate  
62 changes, we predict that communities living in areas of transitional elevation along the Andes  
63 mountain range are vulnerable to the expansion of *Aedes aegypti*.

64

65

66

67

## 68 **Introduction**

69 Mosquito-borne disease transmission poses an ongoing challenge to global public health.  
70 This is especially true in much of Latin America, where arboviral disease management is  
71 complicated by the proliferation of mosquito vectors in tropical conditions, frequently coupled  
72 with limited resources for medical care and comprehensive vector control services [1]. In  
73 Ecuador, the *Aedes aegypti* mosquito is of particular medical importance as it is a competent  
74 vector for several established and emerging viral diseases, including all four serotypes of dengue  
75 virus (DENV), chikungunya (CHKV), Zika virus (ZKV), and yellow fever virus (YFV) [2–5].  
76 The *Ae. albopictus* mosquito, also a competent vector of arboviruses, was recently reported for  
77 the first time in the city of Guayaquil, Ecuador [6]. Many of the diseases transmitted by *Ae. spp.*  
78 have no treatment beyond palliative care, and with the exception of yellow fever and dengue  
79 fever, there are no clinically established vaccines [7–9]. As a result, mosquito surveillance and  
80 control remain the best tools available for preventing and managing outbreaks of arboviral  
81 disease.

82 In Ecuador, the Ministry of Health (Ministerio de Salud Pública (MSP)) oversees public  
83 health vector control services in the country, including mosquito surveillance, indoor residual  
84 spraying, larvicide application, and ultra-low volume (ULV) fogging. The MSP conducts larval  
85 index (LI) surveys at the household level, wherein containers of impounded water are sampled  
86 for mosquito larvae. Larval indices are among the most common indicators used by public health  
87 agencies to establish mosquito presence and quantify abundance, key considerations for  
88 understanding localized transmission potential and planning larval source reduction [10].  
89 Although cost effective relative to the delivery of clinical services, mosquito abatement and  
90 surveillance activities are nevertheless limited by financial constraints, necessitating informed

91 strategies for focusing resources and personnel [11,12]. This becomes a critical factor when  
92 developing surveillance and control programs on very large scales, such as an entire country,  
93 where misdirection of program activities can rapidly deplete program funding. Advancing the  
94 understanding of where vectors of interest can occur on the landscape would provide valuable  
95 guidance in communicating risk of exposure and avoiding the pitfalls associated with  
96 indiscriminately rolling out interventions.

97         Like many mosquito species, the presence of *Ae. spp.* on the landscape is closely tied to  
98 environmental conditions [13,14]. Adult survival and larval development are largely driven and  
99 restricted by temperature, while successful oviposition and larval emergence rely on the  
100 persistence of impounded water in the environment [15–20]. In contrast with other medically  
101 important mosquito species in the region, such as Anopheline vectors of malaria, *Ae. aegypti*  
102 typically does very well in heavily urbanized environments, largely due to their reproductive  
103 strategy of exploiting small volumes of water in containers around the home as larval habitat  
104 [21]. In landscapes with heterogeneous topography, elevation also serves as a limiting factor for  
105 mosquito distributions, as temperature and precipitation change with altitude [22]. Situated in  
106 northwestern South America, Ecuador exemplifies high landscape diversity, with hot, humid  
107 areas of low elevation along the Pacific coast in the west and interior Amazon basin in the east,  
108 and the cool, arid Andes mountain range in the central portion of the country (Fig 1).  
109 Historically, the western coastal and interior regions experience a much higher incidence in  
110 mosquito-borne diseases than mountainous areas, where sharp increases in elevation and  
111 decreases in temperature limit the geographic distribution and vectorial capacity of the mosquito  
112 vector.

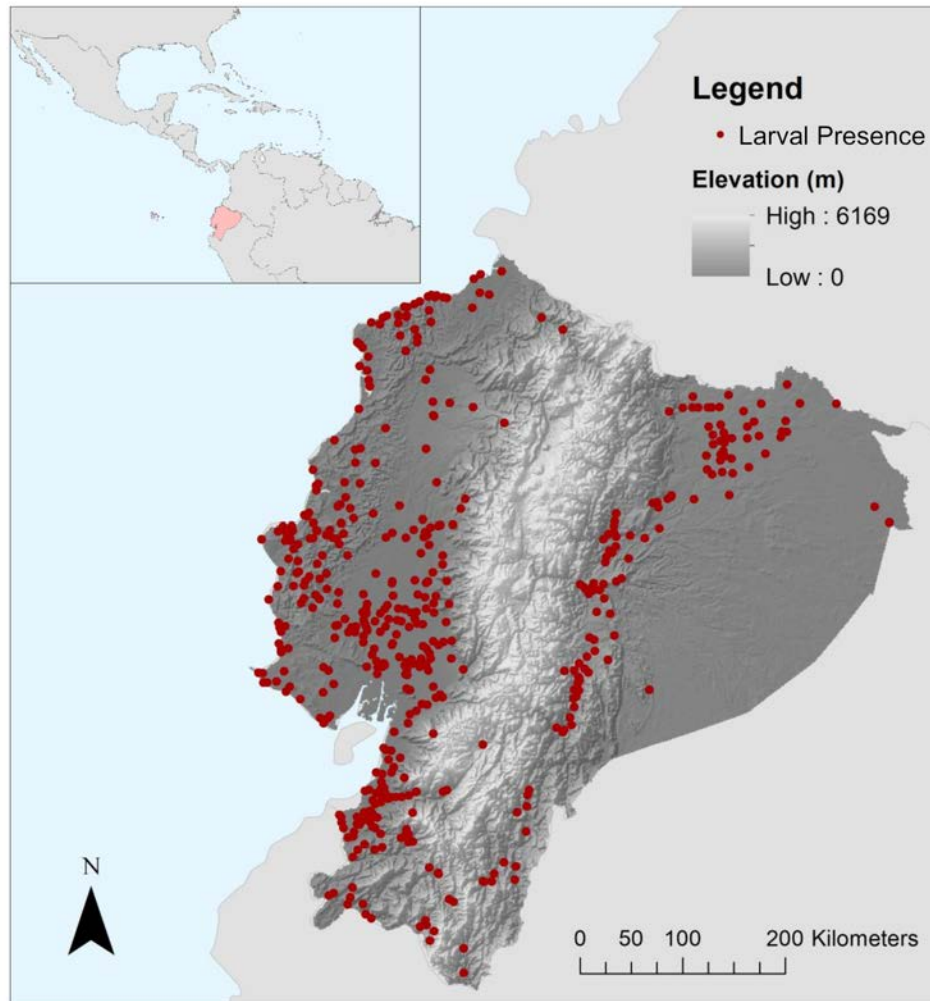

113

114 **Fig. 1.** Ecuador, situated on the northwestern coast of South America (inset), has historically  
115 high prevalence of mosquito-borne diseases. The Ecuadorian Ministerio de Salud Pública (MSP)  
116 conducted household entomological surveys of *Aedes aegypti* throughout the country from 2000  
117 – 2012. Spatially unique larval index (LI) occurrence records (n=478) collected in the survey  
118 were aggregated to cities and towns and used to model the ecological distribution of *Ae. aegypti*  
119 in Ecuador.

120

121 The present-day distribution of *Ae. aegypti* is broadly defined by regional temperature  
122 and precipitation trends, but global climate change has the potential to significantly alter the  
123 future geographic range of mosquito vectors [3]. The Intergovernmental Panel on Climate  
124 Change has established four representative concentration pathways (RCP), or different scenarios  
125 for future greenhouse gas emissions, which are the basis for modeling future climates. Even

126 under the most conservative of these scenarios (RCP 2.6), mean global temperatures are  
127 projected to increase [23]. As temperature trends increase globally, it has been estimated that  
128 observed patterns in the distribution of mosquito vectors will shift accordingly; previous studies  
129 have projected that *Aedes* mosquitoes will increase their global range as temperature and rainfall  
130 patterns become more suitable under various climate change scenarios [17,24–26]. Modeling and  
131 visualizing changes in mosquito distributions at the national level will provide a useful tool for  
132 managing disease and planning the delivery of health services, as public health resources can be  
133 better allocated in anticipation of disease emergence in naïve populations driven by mosquito  
134 range expansions.

135 Ecological niche models (ENMs) have been used to estimate current potential  
136 distributions in insect populations, including mosquitoes, as well as range expansions resulting  
137 from environmental and climate changes [27–30]. ENM methodologies have been applied to  
138 many systems, spanning regional to global scales, in an effort to estimate *Aedes aegypti*  
139 distribution and the associated risk of exposure to humans, often indicating that water availability  
140 and land cover factor heavily into overall mosquito habitat suitability [3,27,31,32]. In Ecuador  
141 and other areas of Latin America, elevation also becomes a limiting factor for *Ae. aegypti*  
142 presence, though it is suggested that climate change may allow for the encroachment of  
143 mosquitoes into higher elevations [30,33]. While many prior studies have utilized records of  
144 adult stages of mosquitoes for ENMs, this study leverages existing larval surveillance data  
145 collected in Ecuador, providing a predictive tool about the source of mosquitoes in the  
146 environment. This complements predictive models for adult stages, particularly in considering  
147 potential for intervention, as it can target larvicidal approaches, rather than reactive adulticidal  
148 spraying methods. The Genetic Algorithm for Rule-Set Production (GARP) is a machine-

149 learning algorithm that builds species ENMs using presence-only occurrence records and  
150 continuous environmental variables [34]. The genetic algorithm (GA) employed by GARP to  
151 build rule-sets for distribution models is stochastic in nature, resulting in a set of models from a  
152 single dataset of species occurrence records and allowing for the assessment of agreement  
153 between resulting models. This methodology offers a robust option for modeling the potential  
154 distribution of species on a landscape from presence-only records, as absence of a species is  
155 difficult to discern through historical records and field sampling (e.g. entomological surveys)  
156 [34,35]. GARP also provides a platform for projecting future climate scenarios onto the landscape  
157 with the natively generated rule-sets for species distribution prediction, allowing for the  
158 estimation of future geographic distributions [36].

159         Assessing current and future vector distributions in an ENM framework is useful for  
160 defining the spatial distribution and possible changes in risk exposure, using mosquito presence  
161 as a proxy for transmission risk. Previous work in Ecuador's southern coast has focused on  
162 describing interannual variation in dengue transmission for a single region [37,38]. Here, we  
163 advance climate services available to the public health sector in Ecuador by providing climate-  
164 informed tools to assist decision-making, examining potential geographic shifts in risk at broader  
165 spatial and temporal scales. In this study, we had three main objectives 1) use an ENM approach  
166 to estimate the current geographic range of *Aedes aegypti* in Ecuador using a unique set of larval  
167 survey data; 2) use projected climate data to model the future geographic range under a variety of  
168 climate change scenarios; and 3) compare current and future climate models to describe changes  
169 in *Ae. aegypti* range over time, where we hypothesized that larval *Ae. aegypti* distribution in  
170 Ecuador would expand into areas of higher elevation with projected increases in global  
171 temperature.



## 172 **Methods**

### 173 **Data sources**

174 From 2000 – 2012 the MSP sampled aquatic larval mosquitoes from impounded water in and  
175 around households, in cities and towns throughout mainland Ecuador. These data were collected  
176 year-round by vector control technicians from the National Service for the Control of Vector-  
177 Borne Diseases (SNEM) of the MSP as part of routine vector surveillance activities. Positive LI  
178 records for *Aedes aegypti* were de-identified and aggregated to the administrative level of  
179 parroquia (township or parish) by the MSP for each year of the study. These de-identified,  
180 spatially aggregated data were made available to this study by the MSP.

### 181 **Informed disaggregation**

182 Parroquias represented in this data set range in size from roughly 2 km<sup>2</sup> to over 8,000 km<sup>2</sup>  
183 (n=991). It was therefore felt to be prudent to reduce this high spatial variation prior to analyses.  
184 To correct for this extreme variation in the spatial resolution of aggregated presence data, in this  
185 study, the number of positive LI locations in a given parroquia were reassigned from the centroid  
186 of the administrative boundary to cities and villages, using a combination of OpenStreetMap and  
187 Google Earth satellite imagery in ArcMap (ver. 10.4) to identify developed areas. This method of  
188 informed disaggregation allowed for better spatial representation without compromising de-  
189 identification.

### 190 **Socio-environmental data acquisition**

191 Environmental coverage datasets for current climatic conditions, comprised of rasterized altitude  
192 and 19 derived biophysical variables (Bioclim), were compiled using publicly available  
193 interpolated weather station data (WorldClim ver. 1.4., <http://worldclim.org>) (Table 1) [39].

194 WorldClim provides long-term climate averages based on weather station records from 1950–  
 195 2000, a period coinciding with the start of the MSP’s larval survey. Because *Ae. aegypti* is  
 196 primarily considered an urban vector in close association with human development, gridded  
 197 human population density, adjusted to data from the United Nations World Population Prospects  
 198 2015 Revision, was also included as an environmental predictor for initial model building as a  
 199 proxy for built land covers (Socioeconomic Data and Applications Center (SEDAC) Gridded  
 200 Population of the World (GPW)) [40,41]. A resolution of 2.5 arc-minutes (i.e. 5km grid cells)  
 201 was chosen for all raster layers to reflect variability in the resolution of geolocated data.

202 **Table 1. Environmental variables used in building GARP models for *Aedes aegypti* in**  
 203 **Ecuador.**

| Environmental Variable (unit)       | Coded Variable Name | Data Source                                 |
|-------------------------------------|---------------------|---------------------------------------------|
| Altitude (m)                        | Alt                 | Worldclim                                   |
| Annual Mean Temperature (°C)        | Bio 1               | Bioclim                                     |
| Mean Diurnal Range (°C)             | Bio 2               | Bioclim                                     |
| Isothermality                       | Bio 3               | Bioclim                                     |
| Temperature Seasonality             | Bio 4               | Bioclim                                     |
| Max Temp of Warmest Month (°C)      | Bio 5               | Bioclim                                     |
| Min Temp of Coldest Month (°C)      | Bio 6               | Bioclim                                     |
| Temperature Annual Range (°C)       | Bio 7               | Bioclim                                     |
| Mean Temperature of Wettest Quarter | Bio 8               | Bioclim                                     |
| Mean Temp of Driest Quarter (°C)    | Bio 9               | Bioclim                                     |
| Mean Temp of Warmest Quarter (°C)   | Bio 10              | Bioclim                                     |
| Mean Temp of Coldest Quarter (°C)   | Bio 11              | Bioclim                                     |
| Annual Precipitation (mm)           | Bio 12              | Bioclim                                     |
| Precip of Wettest Month (mm)        | Bio 13              | Bioclim                                     |
| Precip of Driest Month              | Bio 14              | Bioclim                                     |
| Precip Seasonality                  | Bio 15              | Bioclim                                     |
| Precip of Wettest Quarter (mm)      | Bio 16              | Bioclim                                     |
| Precip of Driest Quarter (mm)       | Bio 17              | Bioclim                                     |
| Precip of Warmest Quarter (mm)      | Bio 18              | Bioclim                                     |
| Precip of Coldest Quarter (mm)      | Bio 19              | Bioclim                                     |
| Human Population Density            | GPW                 | SEDAC Gridded Population of the World (GPW) |

204

205 Environmental coverages for estimated future climatic conditions in the year 2050 were  
206 taken from forecasted Bioclim variables, allowing for direct comparison between current and  
207 future predicted ranges. We chose three general circulation models (GCMs) of physical climate  
208 processes commonly used in projecting shifts in species distributions, the Beijing Climate Center  
209 Climate System Model (BCC-CSM-1), National Center for Atmospheric Research Community  
210 Climate System Model (CCSM4), and the Hadley Centre Global Environment Model version 2,  
211 Earth-System configuration (HADGEM2-ES) under the four standard emissions scenarios (RCP  
212 2.6, RCP 4.5, RCP 6.0, RCP 8.5) [23,42–46]. Gridded human population data available through  
213 SEDAC are only projected through the year 2020 [40]. To obtain human population for the year  
214 2050, a simple linear extrapolation wherein we assume a stable rate of growth, was performed on  
215 a pixel-by-pixel basis in ArcMap with available years of SEDAC data, a growth trend which  
216 mirrors more sophisticated cohort-based population estimates for Ecuador projected for the same  
217 time period [47,48].

### 218 **Ecological niche modeling**

219 Ecological niche models (ENMs) reflecting current and future climate conditions were built  
220 using DesktopGARP ver. 1.1.3 (DG) [35]. LI point records and environmental coverage datasets  
221 were prepared for modeling using the ‘GARPTools’ package (co-developed by C.G. Haase and  
222 J.K. Blackburn) in the program R (ver. 3.3.1). Spatially unique LI records (n=478) were split into  
223 75% training (n=358) and 25% testing datasets (n=119) for ten randomly selected iterations;  
224 training datasets were used in model building and testing datasets were used to compute model  
225 accuracy metrics [34,35,49]. Ten experiments were run in DG, each using one of the randomly  
226 selected LI training datasets and the full set of current environmental coverage variables (Table  
227 2). Each experiment was run for 200 models, allowing for a maximum of 1,000 iterations with a

228 convergence limit of 0.01. Occurrence data were internally partitioned into 75% training/25%  
229 testing for model building, and top models were selected using the ‘Best Subsets’ option,  
230 specifying a 10% hard omission threshold and 50% commission threshold [50]. The ten top best  
231 subsets models from each GARP experiment were summated with the GARPTools package to  
232 assess model agreement and accuracy. Model accuracy metrics for each GARP experiment were  
233 calculated from the 25% testing dataset withheld from the model building process. Three  
234 measures of accuracy, calculated in GARPTools, were used to compare best subsets from each  
235 experiment: receiver operator characteristic (ROC) curve with area under the curve (AUC),  
236 commission, and omission [51].

237 **Table 2. Accuracy metrics for best model subsets built using the full set of environmental**  
238 **coverage variables. Each experiment was performed with a randomly chosen subset (75%)**  
239 **of LI presence points.**

| Experiment | AUC         | Avg.<br>Commission | Avg. Omission |
|------------|-------------|--------------------|---------------|
| 1          | 0.72        | 63.98              | 3.70          |
| 2          | 0.73        | 64.19              | 3.19          |
| 3          | 0.68        | 59.49              | 8.40          |
| 4          | 0.73        | 62.01              | 5.96          |
| 5          | 0.67        | 67.02              | 5.55          |
| 6          | 0.73        | 60.86              | 4.03          |
| 7          | 0.70        | 67.18              | 2.69          |
| 8          | 0.76        | 64.88              | 5.63          |
| <b>9</b>   | <b>0.74</b> | <b>58.78</b>       | <b>4.45</b>   |
| 10         | 0.72        | 60.92              | 5.63          |

240

241 The model building process was then repeated in DG with the best performing training  
242 dataset (i.e. high AUC relative to low omission), comparing full model performance with more  
243 parsimonious sets of environmental variables. In addition to variable combinations selected  
244 based on previous literature, the GARPTools package was used to extract ruleset trends from the  
245 full model (e.g. prevalence and importance of given variables in the resulting model) to assemble

246 additional candidate variable sets for model comparison. The subset of models with the highest  
247 AUC and lowest omission (i.e. best model) was chosen as the most probable estimate of current  
248 larval mosquito geographic distribution, and rulesets generated from the best model were then  
249 projected to the year 2050 for all combinations of GCMs and RCPs. To compare the relative  
250 changes in geographic predictions between current climate and future scenarios, the best subsets  
251 of current and projected future models for each RCP scenario were recoded as binary geographic  
252 distributions (i.e. presence and absence) in ArcMap, where cells with model agreement of  $\geq 6$   
253 were considered present. Recoded distributions were combined using the 'Raster Calculator' tool  
254 in the Spatial Analyst extension of the program ArcMap, allowing for the visualization of range  
255 agreement across GCMs. The number of people at risk in areas of expanding mosquito  
256 distribution, where range expansion was predicted under at least one GCM, was estimated in  
257 ArcMap, using the Raster Calculator tool to extract information on GPW and extrapolated  
258 population for the year 2050.

259

## 260 **Results**

261 The original dataset of LI occurrences in Ecuador, provided by the MSP, consisted of  
262 3,655 collection events aggregated to 374 parroquia centroids, indicating the number of  
263 parroquias that had positive surveillance results for *Ae. aegypti* larvae during the study period.  
264 Dis-aggregation of these data yielded 478 spatially unique locations within these parroquias,  
265 corresponding with areas of human habitation regularly surveyed by the MSP. Incorporating  
266 prior knowledge regarding the agency's collection of data in developed areas allowed for the  
267 adoption of a finer spatial scale for analysis without changing the overall distribution of larval

268 mosquito presence in Ecuador (e.g. mosquitoes remained conspicuously absent in most high-  
 269 elevation parroquias located in the Andes mountains).

270 Much of Ecuador was predicted to be suitable for the presence of *Aedes aegypti* larvae  
 271 under current climatic conditions, with the notable exception of the eastern portion of the country  
 272 associated with the Amazon basin and high elevation areas associated with the Andes mountain  
 273 range, running north to south through the center of the country (Fig 2). This iteration of model  
 274 subsets generated by GARP had the highest AUC, relative to low omission (AUC=0.73, Avg.  
 275 Commission=63.47, Avg. Omission=3.02), and was built with a reduced set of environmental  
 276 variables including altitude, human population, maximum temperature of the warmest month,  
 277 temperature annual range, mean temperature of the wettest month, mean temperature of the  
 278 driest month, mean temperature of the warmest quarter, mean temperature of the coldest quarter,  
 279 precipitation of the wettest month, precipitation seasonality, precipitation of the driest quarter,  
 280 and precipitation of the coldest quarter (Table 3).

281 **Table 3. Accuracy metrics for best model subsets built using the best-ranked training**  
 282 **dataset and selected subsets of environmental coverages.**

| Experiment | Variable Subset                         | AUC         | Avg.<br>Commission | Avg.<br>Omission |
|------------|-----------------------------------------|-------------|--------------------|------------------|
| 1          | Full Model                              | 0.77        | 64.88              | 5.63             |
| 2          | Alt, GPW, Bio 5,7,8,9,10-11,13,15       | 0.71        | 67.38              | 2.60             |
| 3          | Alt, GPW, Bio 2,5,7-11,13,15-17         | 0.71        | 67.32              | 3.28             |
| 4          | Alt, GPW, Bio 1,5,6,8,10-11,14,17,19    | 0.63        | 65.68              | 8.32             |
| 5          | Alt, Bio 5,8,10,16,17                   | 0.62        | 64.30              | 12.01            |
| 6          | Alt, GPW, Bio 5,8,10,16,17              | 0.66        | 67.95              | 2.60             |
| 7          | Alt, Bio 3,5,8,10,12-13,16-17,19        | 0.65        | 68.37              | 3.19             |
| 8          | Alt, GPW, Bio 3,5,8,10,12-13,16-17,19   | 0.66        | 69.88              | 2.18             |
| 9          | Alt, Bio 1,3,5,7,8,9,11-13,15-17,19     | 0.71        | 64.62              | 6.13             |
| 10         | Alt, GPW, Bio 1,3,5,7-9,11-13,15-17,19  | 0.72        | 63.39              | 3.28             |
| 11         | Alt, Bio 1-3,5,7-13,15-17,19            | 0.71        | 61.85              | 4.54             |
| 12         | Alt, GPW, Bio 1-3,5,7-12,13,15-17,19    | 0.72        | 64.09              | 2.94             |
| 13         | Alt, Bio 5,7-11,13,15                   | 0.70        | 65.29              | 4.12             |
| <b>14</b>  | <b>Alt, GPW, Bio 5,7-11,13,15,17,19</b> | <b>0.73</b> | <b>63.47</b>       | <b>3.02</b>      |
| 15         | Alt, GPW, Bio 1,3,5,7-11,13,15-17,19    | 0.71        | 66.20              | 2.06             |

|    |                                      |      |       |      |
|----|--------------------------------------|------|-------|------|
| 16 | Alt, GPW, Bio5,7-11,13,15-17,19      | 0.69 | 67.60 | 3.19 |
| 17 | Alt, GPW, Bio 5,7,8,9,11,13,15,17,19 | 0.71 | 66.22 | 2.44 |
| 18 | Alt, GPW, Bio 1,5,7-11,13,15,17,19   | 0.71 | 66.90 | 2.18 |
| 19 | Alt, GPW, Bio 1,3,5,7-13,15-17,19    | 0.71 | 63.54 | 3.11 |
| 20 | Alt, Bio 5,7-11,13,15,17,19          | 0.71 | 63.24 | 4.62 |

283

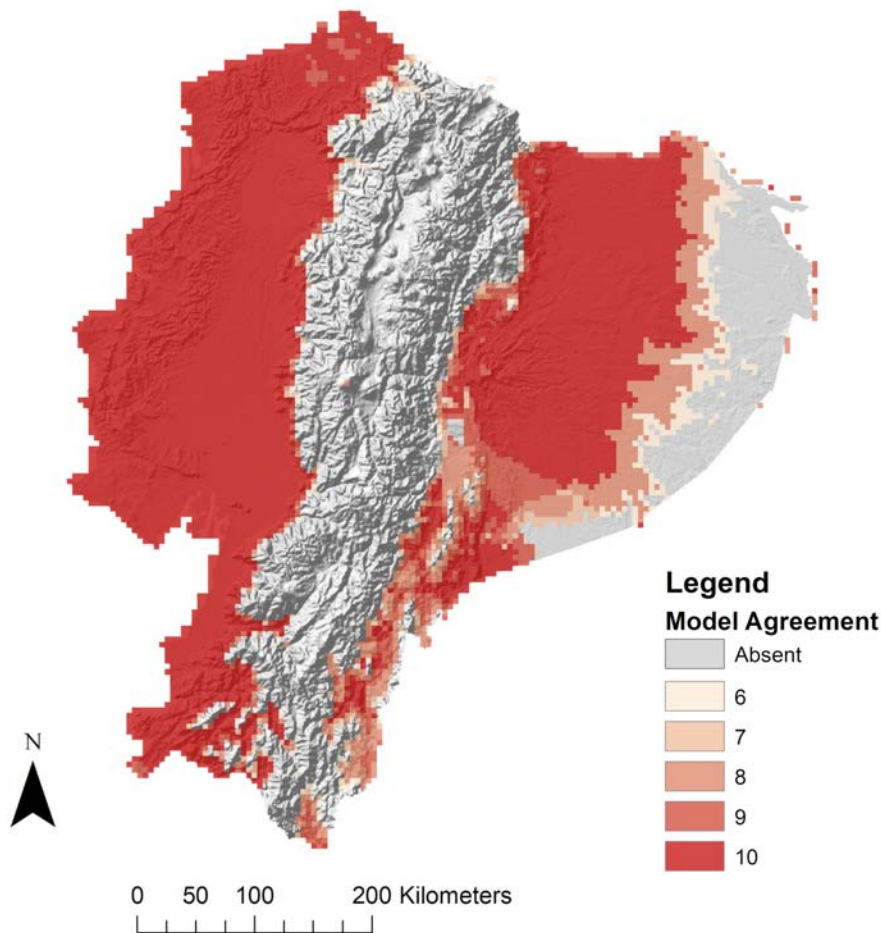

284

285 **Fig. 2.** Agreement of best model subsets built with best-ranked suite of environmental variables  
286 for larval *Aedes aegypti* presence in Ecuador under current climate conditions. Models had high  
287 levels of agreement in the western coastal lowlands, and lower levels of agreement in the eastern  
288 Amazon basin.

289

290 The projected geographic distribution of larval *Ae. aegypti* for the year 2050 (Fig 3B1  
291 and 3B2, 3C1 and 3C2, 3D1 and 3D2, S1 and S2 Figs), built with the best-performing selection

292 of environmental coverages under four climate change scenarios, showed marked changes in  
293 pattern when compared with estimated mosquito presence under current conditions (Fig 3A1 and  
294 3A2, S1 and S2 Figs). Potential distributional shifts were generally consistent across GCMs, with  
295 slight range expansions into areas of higher elevation and large portions of the eastern  
296 Amazonian basin predicting mosquito absence (Fig 3, S1 and S2 Figs). Combining the current  
297 and future model agreement rasters for best subset models by RCP revealed predicted areas of  
298 geographic stability in western Ecuador and the eastern foothills of the Andes, range contraction  
299 throughout much of Amazon basin in the east, and range expansions along transitional elevation  
300 boundaries over time (Fig 4). Range expansions and contractions were generally consistent  
301 across climate models, with the magnitude of distribution change increasing with more extreme  
302 climate change scenarios (Fig 4). Similarly, the human population with the potential to  
303 experience increased exposure to mosquito presence generally increases with RCP, with an  
304 additional 9,473 (RCP2.6), 11,155 (RCP4.5), 10,492 (RCP6.0), and 12,939 (RCP8.5) people  
305 currently living in areas of transitional elevation estimated at risk of becoming exposed under  
306 different climate change scenarios (Table 4).

307 **Table 4. Estimated human population inhabiting areas of transitional elevation in Ecuador,**  
308 **which may experience increased exposure to mosquito-borne disease transmission under**  
309 **climate change.**

| <b>Representative<br/>Concentration<br/>Pathway (RCP)</b> | <b>GPW 2010<br/>Population</b> | <b>Projected 2050<br/>Population</b> | <b>Area (km<sup>2</sup>)</b> |
|-----------------------------------------------------------|--------------------------------|--------------------------------------|------------------------------|
| <b>RCP 2.6</b>                                            | 9,473                          | 15,399                               | 2,755                        |
| <b>RCP 4.5</b>                                            | 11,155                         | 18,439                               | 3,530                        |
| <b>RCP 6.0</b>                                            | 10,492                         | 17,100                               | 3,155                        |
| <b>RCP 8.5</b>                                            | 12,939                         | 21,298                               | 4,215                        |

310

311



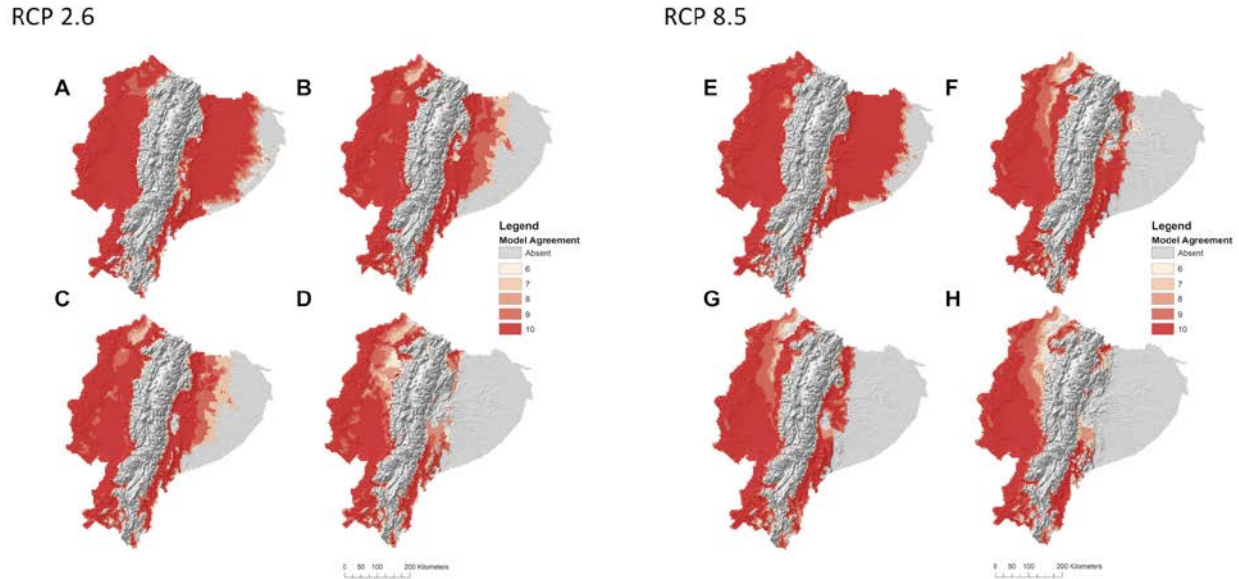

312  
313 **Fig. 3.** Agreement of best model subsets built with best ranked suite of environmental variables  
314 for larval *Aedes aegypti* presence in Ecuador under A) current climate conditions and future  
315 climate conditions projected to the year 2050 under Representative Concentration Pathway (RCP)  
316 2.6 (B1,C1,D1) and 8.5 (B2,C2,D2) for the B) BCC-CSM-1, C) CCSM4, and D) HADGEM2-ES  
317 General Circulation Models (GCM) climate models.

318

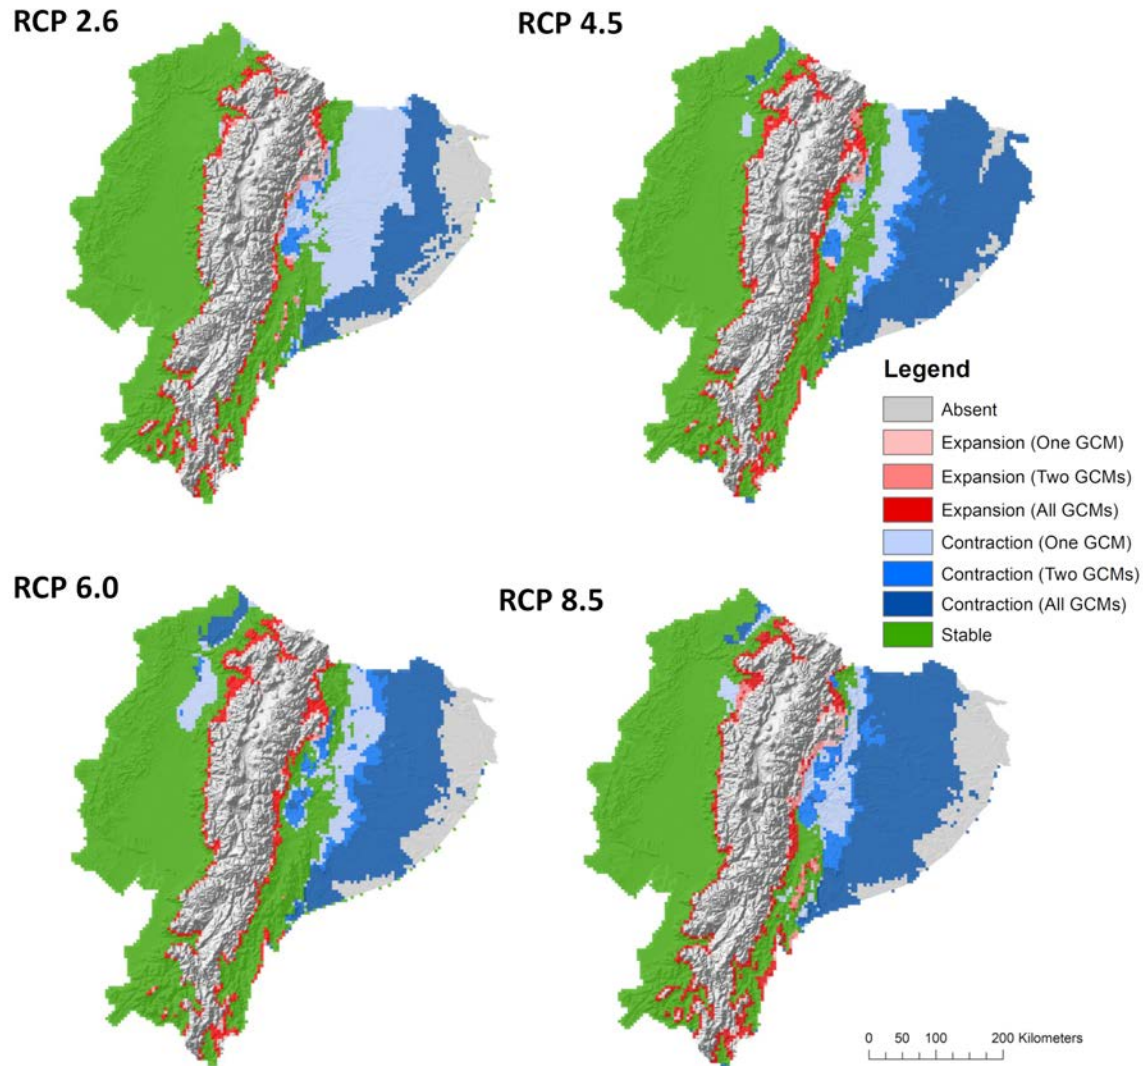

319

320 **Fig. 4.** Best model subsets for current and future climate (GCMs projected to the year 2050) were  
321 combined by RCP emissions scenarios to illustrate the estimated contraction and expansion of  
322 larval *Aedes aegypti* geographic range in Ecuador.

323

## 324 Discussion

325 The predicted current geographic distribution of larval *Aedes aegypti* suitability in Ecuador,  
326 under current climate conditions, largely reflects present-day risk maps for many of the  
327 mosquito-borne diseases currently circulating in the country, wherein populations living at high  
328 altitudes are not considered at-risk for transmission [52]. Predicted larval distributions are

329 roughly continuous in the eastern and western portions of Ecuador, but are sharply restricted  
330 along increasing elevation gradients in the central portion of the country, the area corresponding  
331 with the location of the Andes mountain range (Fig 2) [9]. This conspicuous absence of  
332 mosquitoes in the Andes reflects the generally protective nature of high mountain elevations  
333 from mosquito presence, with all models predicting larval mosquito absence throughout central  
334 Ecuador (Figs 2–6). The predicted absence of *Ae. aegypti* in the eastern portion of the Amazon  
335 basin is notable, as this is a region currently perceived as high-risk for mosquito exposure by  
336 public health officials despite having low human population density, mostly owing to its low  
337 altitude (Fig 2). Although similar in elevation to regions of active disease transmission in the  
338 West, the hydrology of the Amazon basin differs considerably from coastal areas. Previous work  
339 in this region suggests a great deal of spatial variability in the basin with regards to precipitation  
340 and drainage patterns [53,54]. Given that the mosquito life cycle depends heavily on the  
341 availability of water in the environment, spatial discrepancies in precipitation could account for  
342 the low model agreement of mosquito presence in the easternmost portion of the Amazon.

343         Range expansion of *Ae. aegypti* into higher elevations as a result of changing climate was  
344 supported across GCM models and emissions scenarios (Figs 3–7). All best model subsets  
345 suggest that areas of transitional elevation along the eastern and western peripheries of the Andes  
346 mountains may experience some level of increased exposure to the presence of mosquitoes,  
347 though much of the mountain range, including densely populated areas like the capital city,  
348 Quito, will remain unsuitable habitat. The intrusion of *Ae. aegypti* into areas of transitioning  
349 elevation represents a potential area of concern for public health managers, as communities in  
350 these areas are largely protected from mosquito exposure and associated diseases under current  
351 climatic conditions. Excluding travel-related cases, reporting of arboviral diseases in Ecuador's

352 mountain dwelling populations is quite low, although there are low-lying valleys near Quito that  
353 may be suitable for arbovirus transmission. Accordingly, the MSP primarily directs mosquito-  
354 borne disease outreach and intervention efforts to high-risk communities, particularly in large  
355 coastal cities with consistently high disease incidence, such as Guayaquil and Machala. As a  
356 result, communities situated in the foothills of the Andes will not necessarily have the same risk  
357 perceptions and preventative behaviors as those communities burdened with historically high  
358 incidence of mosquito-borne diseases. This sets the stage for potential disparities in preventative  
359 knowledge and health services should *Aedes* mosquitoes expand into naïve populations [5,55].  
360 Conversely, extirpation of *Ae. aegypti*, especially the large range contraction predicted in  
361 Amazonian Ecuador, has the potential to conserve valuable resources by triggering allocation  
362 shifts as unsuitable areas no longer support active disease transmission.

363         Our findings are broadly consistent with a previous coarser scale ENM analysis of adult  
364 mosquitoes in Ecuador, which suggests that while *Aedes* mosquitoes may shift into highland  
365 areas under changing climate conditions, the total area of suitable habitat will ultimately decrease  
366 as localized climatic conditions favor extirpation [30]. However, models of *Aedes* distribution in  
367 the previous study were made through the year 2100, representing an extended time horizon for  
368 guiding agency decision making. While predicted ranges in 2100 are visually similar to results  
369 presented here, notable discrepancies exist between the spatial distributions predicted in our  
370 models and the previous study for 2050, where the previous model predicts widespread absence  
371 of mosquitoes in central Ecuador and presence throughout much of the eastern Amazon basin. In  
372 contrast to our methods, Escobar *et al.* [30] used a different niche modeling algorithm, a different  
373 model of climate change (A2), a coarser spatial resolution (20 km), and combined global species  
374 occurrence for two adult arbovirus vectors, *Ae. aegypti* and the Asian tiger mosquito (*Aedes*

375 *albopictus*), to predict pooled arbovirus risk throughout Ecuador. Though *Ae. aegypti* and *Ae.*  
376 *albopictus* are competent vectors of diseases that occur in Ecuador (e.g. dengue, chikungunya,  
377 Zika), these species differ significantly in their physiology, possibly driving observed  
378 discrepancies between the models of pooled adult *Aedes spp.* risk and larval *Ae. aegypti* range  
379 [56]. Reaching consensus across ENMs is a known area of conflict in ecology that requires more  
380 research, where various methodologies can lead to vastly different forecasts of geographic  
381 distributions and risk, making direct comparisons between models difficult [57]. Future studies  
382 combining multiple approaches and comparing the impact of input on models could help resolve  
383 this conundrum.

384         We chose a moderately low spatial resolution for this study (5km raster cells) to reflect  
385 the highest level of precision that could be assigned to larval mosquito occurrence (i.e. points  
386 could be matched to cities or clusters of villages, but not to individual households or  
387 neighborhoods). This scale of analysis presents a limitation in applying resulting ENMs for local  
388 management decisions. Arboviral disease transmission and larval mosquito presence, especially  
389 for *Ae. aegypti*, are typically managed at the household or neighborhood level, and although we  
390 can use these results to discuss regional changes in mosquito distribution throughout Ecuador,  
391 we cannot overstate the findings as a means to assess risk at the level of disease transmission  
392 [58]. Furthermore, the LI survey conducted by the MSP was limited in that focus was placed on  
393 sampling areas with perceived arbovirus transmission risk throughout Ecuador, especially  
394 households in densely populated urban centers and established communities where cases had  
395 been reported in the past. Low accessibility and human population density in Ecuador's eastern  
396 basin region may have contributed to under sampling of mosquito presence in these areas,  
397 possibly accounting for low model agreement in this area. Ultimately, robust vector surveillance

398 for *Ae. aegypti* in eastern Ecuador would be required to validate absence in this region, though  
399 such intensive ground-truthing would be wrought with logistical concerns, including diversion of  
400 scarce surveillance resources from high-demand management districts and the inherent difficulty  
401 of establishing “true” absence via surveys.

402 *Aedes aegypti* is a globally invasive species, owing much of its success to its close  
403 connection with human activity and urban environments. As a result, microclimate can become a  
404 critical factor in determining true habitat suitability, and there are many examples of  
405 anthropogenic structures providing a buffering effect, or refuge, against climatic conditions that  
406 would be otherwise physiologically limiting to insect vectors [5,59–62]. Similarly, dramatic  
407 shifts in species compositions in Ecuador, mediated by elevation, also occur on very fine spatial  
408 scales [63,64]. Moving forward, observed areas of range expansion on the edge of unsuitable  
409 habitat may be better modeled at finer resolutions, which would aid in making community-  
410 targeted management decisions based on estimated risk.

411 Based on the results of this study, we conclude that the geographic distribution of larval  
412 *Aedes aegypti* in Ecuador will be impacted by projected shifts in climate. Extensive changes in  
413 modeled vector distributions were observed even under the most conservative climate change  
414 scenario, and these changes, although consistent in pattern, became more evident with  
415 increasingly high greenhouse gas emissions scenarios. Although there is a continued need for  
416 surveillance activities, these findings enable us to anticipate transitioning risk of arboviral  
417 diseases in a spatial context throughout Ecuador, allowing for long-term planning of agency  
418 vector control strategies.

419

## 420 **Acknowledgements**

421 Many thanks to the field technicians and other staff at the National Service for the Control of  
422 Vector Borne Diseases of the Ministry of Health of Ecuador, who generated the data used in this  
423 analysis.

## 424 **References**

- 425 1. Alava, A., Mosquera, C., Vargas, W., Real, J. Dengue en el Ecuador 1989-2002. *Rev Ecuat*  
426 *Hig Med Trop.* 2005;42: 11–34.
- 427 2. Fontenille D, Diallo M, Mondo M, Ndiaye M, Thonnon J. First evidence of natural vertical  
428 transmission of yellow fever virus in *Aedes aegypti*, its epidemic vector. *Trans R Soc Trop*  
429 *Med Hyg.* 1997;91: 533–535.
- 430 3. Campbell LP, Luther C, Moo-Llanes D, Ramsey JM, Danis-Lozano R, Peterson AT.  
431 Climate change influences on global distributions of dengue and chikungunya virus vectors.  
432 *Philos Trans R Soc B Biol Sci.* 2015;370: 20140135–20140135.  
433 doi:10.1098/rstb.2014.0135
- 434 4. Pan American Health Organization, World Health Organization. Zika suspected and  
435 confirmed cases reported by countries and territories in the Americas. Cumulative cases,  
436 2015 - 2016. [Internet]. PAN/WHO, Washington, D.C.; 2016. Available:  
437 [http://www.paho.org/hq/index.php?option=com\\_content&view=article&id=12390&Itemid](http://www.paho.org/hq/index.php?option=com_content&view=article&id=12390&Itemid=42090&lang=en)  
438 [=42090&lang=en](http://www.paho.org/hq/index.php?option=com_content&view=article&id=12390&Itemid=42090&lang=en)
- 439 5. Stewart Ibarra AM, Ryan SJ, Beltrán E, Mejía R, Silva M, Muñoz Á. Dengue Vector  
440 Dynamics (*Aedes aegypti*) Influenced by Climate and Social Factors in Ecuador:  
441 Implications for Targeted Control. Mores CN, editor. *PLoS ONE.* 2013;8: e78263.  
442 doi:10.1371/journal.pone.0078263
- 443 6. Ponce P, Morales D, Argoti A, Cevallos VE. First Report of *Aedes (Stegomyia) albopictus*  
444 (Skuse) (Diptera: Culicidae), the Asian Tiger Mosquito, in Ecuador. *J Med Entomol.*  
445 2018;55: 248–249. doi:10.1093/jme/tjx165
- 446 7. Aggarwal A, Garg N. Newer Vaccines against Mosquito-borne Diseases. *Indian J Pediatr.*  
447 2018;85: 117–123. doi:10.1007/s12098-017-2383-4
- 448 8. WHO. Questions and answers on dengue vaccines: efficacy and longer-term safety of  
449 CYD-TDV. World Health Organization; 2015.
- 450 9. Gershman MD, Jentes ES, Stoney RJ, Tan KR, Arguin PM, Steele SF. Yellow fever and  
451 malaria information by country. *CDC Health Inf Int Travel.* 2016;3.

- 452 10. WHO. Global Strategy for dengue prevention and control, 2012-2020. World Health  
453 Organization Report; 2012.
- 454 11. Pepin KM, Marques-Toledo C, Scherer L, Morais MM, Ellis B, Eiras AE. Cost-  
455 effectiveness of Novel System of Mosquito Surveillance and Control, Brazil. *Emerg Infect*  
456 *Dis.* 2013;19: 542–550. doi:10.3201/eid1904.120117
- 457 12. White MT, Conteh L, Cibulskis R, Ghani AC. Costs and cost-effectiveness of malaria  
458 control interventions--a systematic review. *Malar J.* 2011;10: 337. doi:10.1186/1475-2875-  
459 10-337
- 460 13. Grillet M-E, Barrera R, Martinez J-E, Berti J, Fortin M-J. Disentangling the Effect of Local  
461 and Global Spatial Variation on a Mosquito-Borne Infection in a Neotropical  
462 Heterogeneous Environment. *Am J Trop Med Hyg.* 2010;82: 194–201.  
463 doi:10.4269/ajtmh.2010.09-0040
- 464 14. Smith DL, Dushoff J, McKenzie FE. The Risk of a Mosquito-Borne Infection in a  
465 Heterogeneous Environment. Andy P. Dobson, editor. *PLoS Biol.* 2004;2: e368.  
466 doi:10.1371/journal.pbio.0020368
- 467 15. Bar-Zeev M. The Effect of Temperature on the Growth Rate and Survival of the Immature  
468 Stages of *Aedes aegypti* (L.). *Bull Entomol Res.* 1958;49: 157.  
469 doi:10.1017/S0007485300053499
- 470 16. Bargielowski I, Nimmo D, Alphey L, Koella JC. Comparison of life history characteristics  
471 of the genetically modified OX513A line and a wild type strain of *Aedes aegypti*. *PloS*  
472 *One.* 2011;6: e20699. doi:10.1371/journal.pone.0020699
- 473 17. Roiz D, Rosà R, Arnoldi D, Rizzoli A. Effects of temperature and rainfall on the activity  
474 and dynamics of host-seeking *Aedes albopictus* females in northern Italy. *Vector Borne*  
475 *Zoonotic Dis Larchmt N.* 2010;10: 811–816. doi:10.1089/vbz.2009.0098
- 476 18. Tun-Lin W, Burkot TR, Kay BH. Effects of temperature and larval diet on development  
477 rates and survival of the dengue vector *Aedes aegypti* in north Queensland, Australia. *Med*  
478 *Vet Entomol.* 2000;14: 31–37. doi:10.1046/j.1365-2915.2000.00207.x
- 479 19. Rueda LM, Patel KJ, Axtell RC, Stinner RE. Temperature-dependent development and  
480 survival rates of *Culex quinquefasciatus* and *Aedes aegypti* (Diptera: Culicidae). *J Med*  
481 *Entomol.* 1990;27: 892–898.
- 482 20. Yang HM, Macoris MLG, Galvani KC, Andrighetti MTM, Wanderley DMV. Assessing the  
483 effects of temperature on the population of *Aedes aegypti*, the vector of dengue. *Epidemiol*  
484 *Infect.* 2009;137: 1188. doi:10.1017/S0950268809002040
- 485 21. Araújo H, Carvalho D, Ioshino R, Costa-da-Silva A, Capurro M. *Aedes aegypti* Control  
486 Strategies in Brazil: Incorporation of New Technologies to Overcome the Persistence of  
487 Dengue Epidemics. *Insects.* 2015;6: 576–594. doi:10.3390/insects6020576



- 488 22. Townsend Peterson A, Osorio J, Quiao H, Escobar LE. Zika virus, elevation, and  
489 transmission risk. PLOS ONE Curr Outbreaks. 2016;
- 490 23. IPCC. Climate Change 2014: Impacts, Adaptation, and Vulnerability. Part A: Global and  
491 Sectoral Aspects. Contribution of the Working Group II to the Fifth Assessment Report of  
492 the Intergovernmental Panel on Climate Change. Cambridge University Press, Cambridge,  
493 UK and New York, USA; 2014.
- 494 24. Hopp MJ, Foley JA. Global-scale relationships between climate and the dengue fever  
495 vector, *Aedes aegypti*. Clim Change. 2001;48: 441–463.
- 496 25. Rochlin I, Ninivaggi DV, Hutchinson ML, Farajollahi A. Climate Change and Range  
497 Expansion of the Asian Tiger Mosquito (*Aedes albopictus*) in Northeastern USA:  
498 Implications for Public Health Practitioners. Oliveira PL, editor. PLoS ONE. 2013;8:  
499 e60874. doi:10.1371/journal.pone.0060874
- 500 26. Patz JA, Campbell-Lendrum D, Holloway T, Foley JA. Impact of regional climate change  
501 on human health. Nature. 2005;438: 310–317. doi:10.1038/nature04188
- 502 27. Peterson AT, Martínez-Campos C, Nakazawa Y, Martínez-Meyer E. Time-specific  
503 ecological niche modeling predicts spatial dynamics of vector insects and human dengue  
504 cases. Trans R Soc Trop Med Hyg. 2005;99: 647–655. doi:10.1016/j.trstmh.2005.02.004
- 505 28. Sidder AM, Kumar S, Laituri M, Sibold JS. Using spatiotemporal correlative niche models  
506 for evaluating the effects of climate change on mountain pine beetle. Ecosphere. 2016;7:  
507 e01396. doi:10.1002/ecs2.1396
- 508 29. Alimi TO, Fuller DO, Qualls WA, Herrera SV, Arevalo-Herrera M, Quinones ML, et al.  
509 Predicting potential ranges of primary malaria vectors and malaria in northern South  
510 America based on projected changes in climate, land cover and human population. Parasit  
511 Vectors. 2015;8. doi:10.1186/s13071-015-1033-9
- 512 30. Escobar LE, Romero-Alvarez D, Leon R, Lepe-Lopez MA, Craft ME, Borbor-Cordova MJ,  
513 et al. Declining Prevalence of Disease Vectors Under Climate Change. Sci Rep. 2016;6:  
514 39150.
- 515 31. Baak-Baak CM, Moo-Llanes DA, Cigarroa-Toledo N, Puerto FI, Machain-Williams C,  
516 Reyes-Solis G, et al. Ecological Niche Model for Predicting Distribution of Disease-Vector  
517 Mosquitoes in Yucatán State, México. J Med Entomol. 2017;54: 854–861.  
518 doi:10.1093/jme/tjw243
- 519 32. Kraemer MUG, Sinka ME, Duda KA, Mylne AQN, Shearer FM, Barker CM, et al. The  
520 global distribution of the arbovirus vectors *Aedes aegypti* and *Ae. albopictus*. eLife.  
521 2015;4: e08347. doi:10.7554/eLife.08347
- 522 33. Equihua M, Ibáñez-Bernal S, Benítez G, Estrada-Contreras I, Sandoval-Ruiz CA,  
523 Mendoza-Palmero FS. Establishment of *Aedes aegypti* (L.) in mountainous regions in

- 524 Mexico: Increasing number of population at risk of mosquito-borne disease and future  
525 climate conditions. *Acta Trop.* 2017;166: 316–327. doi:10.1016/j.actatropica.2016.11.014
- 526 34. Stockwell D, Peters D. The GARP modelling system: problems and solutions to automated  
527 spatial prediction. *Int J Geogr Inf Sci.* 13: 143–158.
- 528 35. Adjemian JCZ, Girvetz EH, Beckett L, Foley JE. Analysis of genetic algorithm for rule-set  
529 production (GARP) modeling approach for predicting distributions of fleas implicated as  
530 vectors of plague, *Yersinia pestis*, in California. *J Med Entomol.* 43: 93–103.
- 531 36. Peterson AT, Ortega-Huerta MA, Bartley J, Sánchez-Cordero V, Soberón J, Buddemeier  
532 RH, et al. Future projections for Mexican faunas under global climate change scenarios.  
533 *Nature.* 2002;416: 626–629. doi:10.1038/416626a
- 534 37. Lowe R, Stewart-Ibarra AM, Petrova D, García-Díez M, Borbor-Cordova MJ, Mejía R, et  
535 al. Climate services for health: predicting the evolution of the 2016 dengue season in  
536 Machala, Ecuador. *Lancet Planet Health.* 2017;1: e142–e151. doi:10.1016/S2542-  
537 5196(17)30064-5
- 538 38. Stewart-Ibarra AM, Lowe R. Climate and Non-Climate Drivers of Dengue Epidemics in  
539 Southern Coastal Ecuador. *Am J Trop Med Hyg.* 2013;88: 971–981. doi:10.4269/ajtmh.12-  
540 0478
- 541 39. Hijmans RJ, Cameron SE, Parra JL, Jones PG, Jarvis A. Very high resolution interpolated  
542 climate surfaces for global land areas. *Int J Climatol.* 2005;25: 1965–1978.  
543 doi:10.1002/joc.1276
- 544 40. Center For International Earth Science Information Network-CIESIN-Columbia University.  
545 Gridded Population of the World, Version 4 (GPWv4): Population Density Adjusted to  
546 Match 2015 Revision of UN WPP Country Totals [Internet]. Palisades, NY: NASA  
547 Socioeconomic Data and Applications Center (SEDAC); 2016. doi:10.7927/H4HX19NJ
- 548 41. UN DESA. 2015 Revision of World Population Prospects [Internet]. United Nations  
549 Department of Economic and Social Affairs, Population Division; 2015. Available:  
550 <https://esa.un.org/unpd/wpp/>
- 551 42. Randall DA, Wood RA, Bony S, Colman R, Fichetef T, Fyfe J, et al. Climate Models and  
552 Their Evaluation. *Climate Change 2007: The Physical Science Basis Contribution of*  
553 *Working Group I to the Fourth Assessment Report of the Intergovernmental Panel on*  
554 *Climate Change.* Cambridge University Press, Cambridge, UK and New York, USA; 2007.
- 555 43. Collins WJ, Bellouin N, Doutriaux-Boucher M, Gedney N, Hinton T, Jones CD, et al.  
556 Evaluation of the HadGEM2 model [Internet]. Met Office Hadley Centre; 2008. Report  
557 No.: Technical Note no. HCTN 74. Available:  
558 <http://www.metoffice.gov.uk/publications/HCTN/index.html>

- 559 44. Carlson CJ, Burgio KR, Dougherty ER, Phillips AJ, Bueno VM, Clements CF, et al.  
560 Parasite biodiversity faces extinction and redistribution in a changing climate. *Sci Adv*.  
561 2017;3: e1602422. doi:10.1126/sciadv.1602422
- 562 45. Samy AM, Elaagip AH, Kenawy MA, Ayres CFJ, Peterson AT, Soliman DE. Climate  
563 Change Influences on the Global Potential Distribution of the Mosquito *Culex*  
564 *quinquefasciatus*, Vector of West Nile Virus and Lymphatic Filariasis. LaDeau SL, editor.  
565 PLOS ONE. 2016;11: e0163863. doi:10.1371/journal.pone.0163863
- 566 46. Sales LP, Neves OV, De Marco P, Loyola R. Model uncertainties do not affect observed  
567 patterns of species richness in the Amazon. Guralnick R, editor. PLOS ONE. 2017;12:  
568 e0183785. doi:10.1371/journal.pone.0183785
- 569 47. Siegel J, Swanson D. Population Projections. *The Methods and Materials of Demography*.  
570 Elsevier Academic Press, San Diego; 2004.
- 571 48. UN DESA. 2017 Revision of World Population Prospects [Internet]. United Nations  
572 Department of Economic and Social Affairs, Population Division; 2017. Available:  
573 <https://esa.un.org/unpd/wpp/>
- 574 49. Barro AS, Fegan M, Moloney B, Porter K, Muller J, Warner S, et al. Redefining the  
575 Australian Anthrax Belt: Modeling the Ecological Niche and Predicting the Geographic  
576 Distribution of *Bacillus anthracis*. Small PLC, editor. PLoS Negl Trop Dis. 2016;10:  
577 e0004689. doi:10.1371/journal.pntd.0004689
- 578 50. Anderson RP, Lew D, Peterson AT. Evaluating predictive models of species' distributions:  
579 criteria for selecting optimal models. *Ecol Model*. 2003;162: 211–232.
- 580 51. McNyset KM. Use of ecological niche modelling to predict distributions of freshwater fish  
581 species in Kansas. *Ecol Freshw Fish*. 2005;14: 243–255. doi:10.1111/j.1600-  
582 0633.2005.00101.x
- 583 52. CDC. Health Information for Travelers to Ecuador, Including the Galapagos Islands  
584 [Internet]. Centers for Disease Control; 2016. Available:  
585 <http://wwwnc.cdc.gov/travel/destinations/traveler/none/ecuador>
- 586 53. Laraque A, Ronchail J, Cochonneau G, Pombosa R, Guyot JL. Heterogeneous Distribution  
587 of Rainfall and Discharge Regimes in the Ecuadorian Amazon Basin. *J Hydrometeorol*.  
588 2007;8: 1364–1381. doi:10.1175/2007JHM784.1
- 589 54. Espinoza Villar JC, Ronchail J, Guyot JL, Cochonneau G, Naziano F, Lavado W, et al.  
590 Spatio-temporal rainfall variability in the Amazon basin countries (Brazil, Peru, Bolivia,  
591 Colombia, and Ecuador). *Int J Climatol*. 2009;29: 1574–1594. doi:10.1002/joc.1791
- 592 55. A. Siregar F, Rusli Abdu M, Omar J, Muda Sarum S, Supriyadi T, Makmur T, et al. Social  
593 and Environmental Determinants of Dengue Infection Risk in North Sumatera Province,  
594 Indonesia. *Asian J Epidemiol*. 2015;8: 23–35. doi:10.3923/aje.2015.23.35

- 595 56. Mordecai EA, Cohen JM, Evans MV, Gudapati P, Johnson LR, Lippi CA, et al. Detecting  
596 the impact of temperature on transmission of Zika, dengue, and chikungunya using  
597 mechanistic models. Althouse B, editor. PLoS Negl Trop Dis. 2017;11: e0005568.  
598 doi:10.1371/journal.pntd.0005568
- 599 57. Carlson CJ, Dougherty E, Boots M, Getz W, Ryan SJ. Consensus and conflict among  
600 ecological forecasts of Zika virus outbreaks in the United States. Sci Rep. 2018;8.  
601 doi:10.1038/s41598-018-22989-0
- 602 58. Yoon I-K, Getis A, Aldstadt J, Rothman AL, Tannitisupawong D, Koenraadt CJM, et al.  
603 Fine Scale Spatiotemporal Clustering of Dengue Virus Transmission in Children and Aedes  
604 aegypti in Rural Thai Villages. Barrera R, editor. PLoS Negl Trop Dis. 2012;6: e1730.  
605 doi:10.1371/journal.pntd.0001730
- 606 59. Paaijmans KP, Thomas MB. The influence of mosquito resting behaviour and associated  
607 microclimate for malaria risk. Malar J. 2011;10: 183. doi:10.1186/1475-2875-10-183
- 608 60. Murdock CC, Evans MV, McClanahan TD, Miazgowiec KL, Tesla B. Fine-scale variation  
609 in microclimate across an urban landscape shapes variation in mosquito population  
610 dynamics and the potential of Aedes albopictus to transmit arboviral disease. Scarpino SV,  
611 editor. PLoS Negl Trop Dis. 2017;11: e0005640. doi:10.1371/journal.pntd.0005640
- 612 61. Tsunoda T, Cuong TC, Dong TD, Yen NT, Le NH, Phong TV, et al. Winter Refuge for  
613 Aedes aegypti and Ae. albopictus Mosquitoes in Hanoi during Winter. Zhu KY, editor.  
614 PLoS ONE. 2014;9: e95606. doi:10.1371/journal.pone.0095606
- 615 62. Vazquez-Prokopec G., Ceballos L., Cecere M., Gürtler R. Seasonal variations of  
616 microclimatic conditions in domestic and peridomestic habitats of Triatoma infestans in  
617 rural northwest Argentina. Acta Trop. 2002;84: 229–238. doi:10.1016/S0001-  
618 706X(02)00204-8
- 619 63. Keating P. Changes in Paramo vegetation along an elevation gradient in Southern Ecuador.  
620 J Torrey Bot Soc. 1999;126: 159–175.
- 621 64. Rodríguez-Castañeda G, Dyer LA, Brehm G, Connahs H, Forkner RE, Walla TR. Tropical  
622 forests are not flat: how mountains affect herbivore diversity: Tropical forests are not flat.  
623 Ecol Lett. 2010;13: 1348–1357. doi:10.1111/j.1461-0248.2010.01525.x

624

625

626

627 **Supporting information**

628 **S1 Table. Prevalence of environmental coverages in model building ruleset.**

| <b>Environmental Variable</b> | <b>Ruleset Prevalence</b> |
|-------------------------------|---------------------------|
| Alt                           | 0.94                      |
| Bio 5                         | 0.94                      |
| Bio 7                         | 0.91                      |
| Bio 8                         | 0.82                      |
| Bio 9                         | 0.85                      |
| Bio 10                        | 0.85                      |
| Bio 11                        | 0.74                      |
| Bio 13                        | 0.88                      |
| Bio 15                        | 0.68                      |
| Bio 17                        | 0.94                      |
| Bio 19                        | 0.85                      |
| GPW                           | 0.74                      |

629

630

631

632

633

634 **S1 Fig.** Agreement of best model subsets built with best ranked suite of environmental variables  
635 for larval *Aedes aegypti* presence in Ecuador under A) current climate conditions and future  
636 climate conditions projected to the year 2050 under Representative Concentration Pathway  
637 (RCP) 4.5 for the B) BCC-CSM-1, C) CCSM4, and D) HADGEM2-ES General Circulation  
638 Models (GCM) climate models.

RCP 4.5

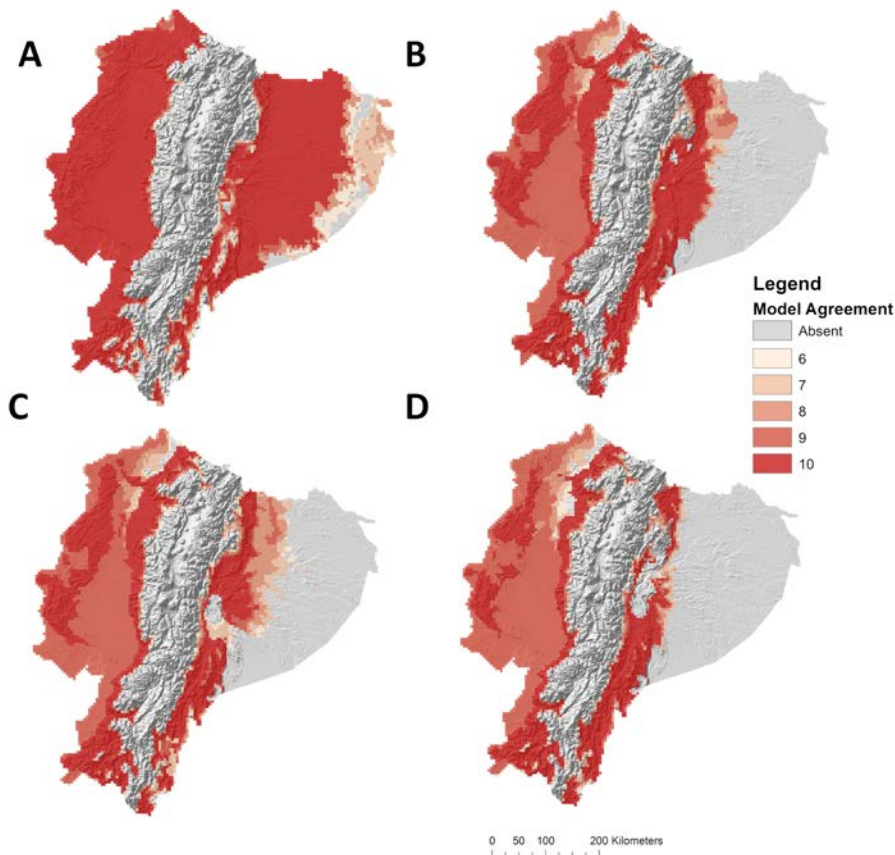

639

640

## RCP 6.0

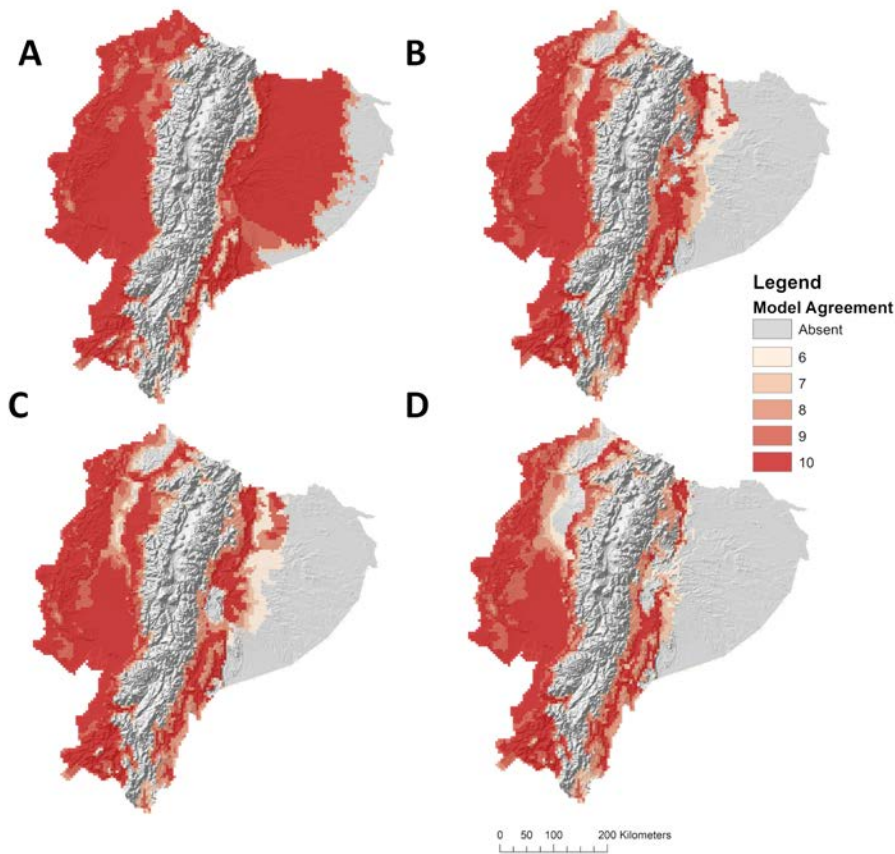

641

642

643 **S2 Fig.** Agreement of best model subsets built with best ranked suite of environmental variables  
644 for larval *Aedes aegypti* presence in Ecuador under A) current climate conditions and future  
645 climate conditions projected to the year 2050 under Representative Concentration Pathway  
646 (RCP) 6.0 for the B) BCC-CSM-1, C) CCSM4, and D) HADGEM2-ES General Circulation  
647 Models (GCM) climate models.
